# Supplementary material
Source: PubMed Central journal article supplement (PMC4493764)
Supplement: NIHMS673354-supplement-01.pdf [file NIHMS673354-supplement-01.pdf]

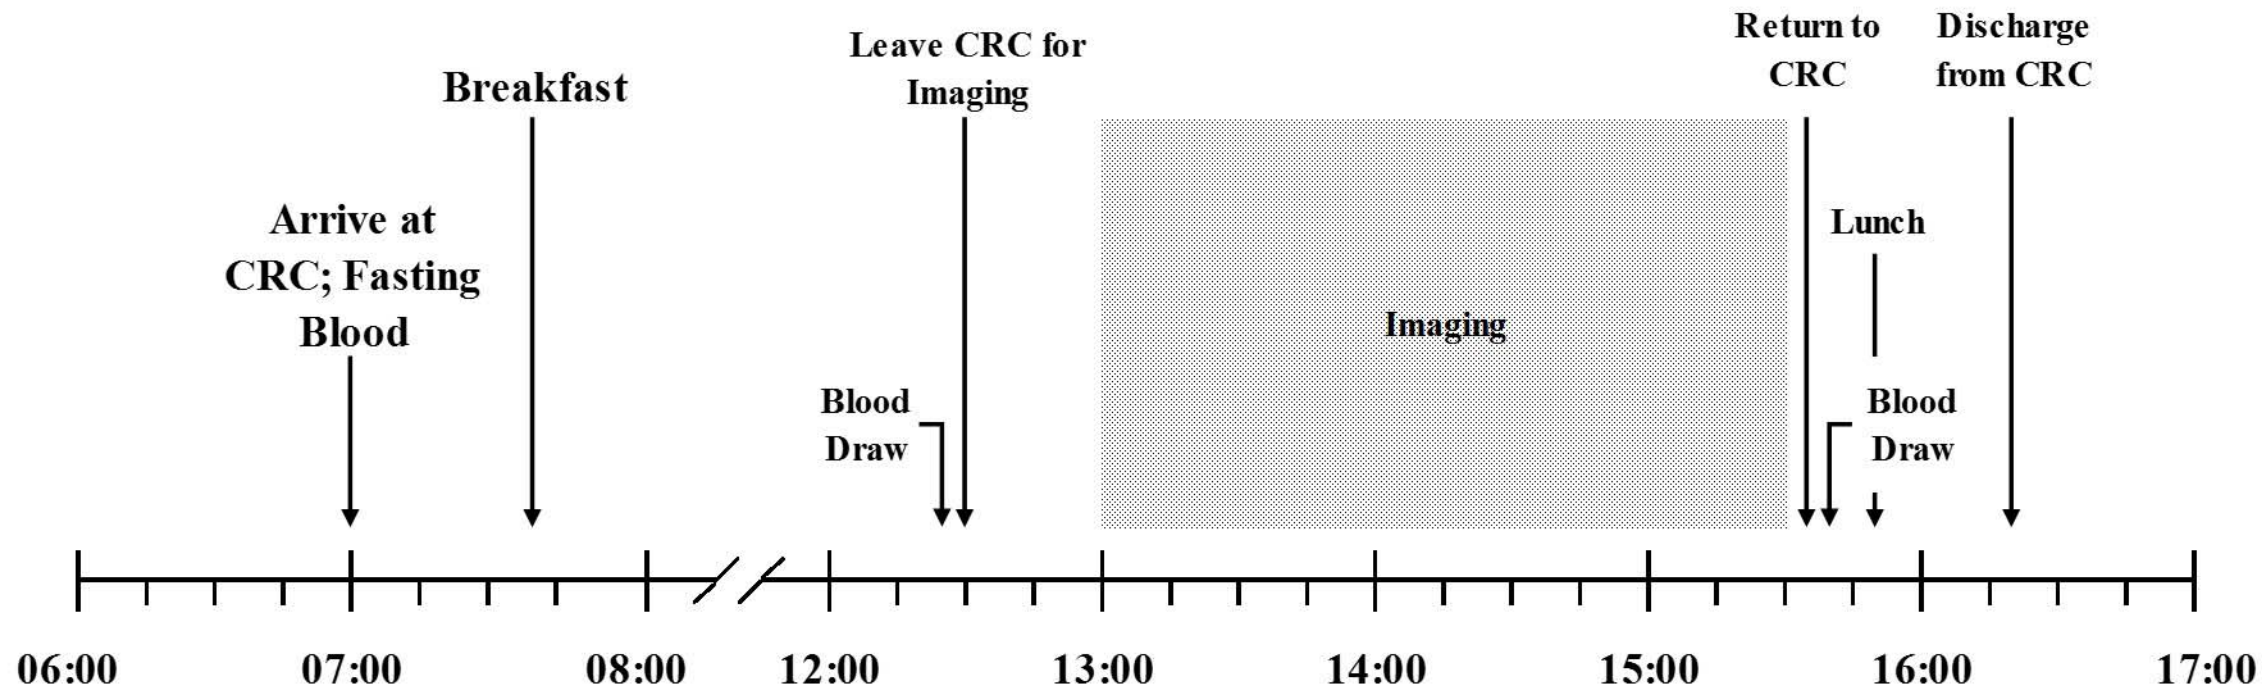

Figure S1. Study Day Timeline

# ODOR PERCEPTION SCALES

# HUNGER SCALES

## INTENSITY

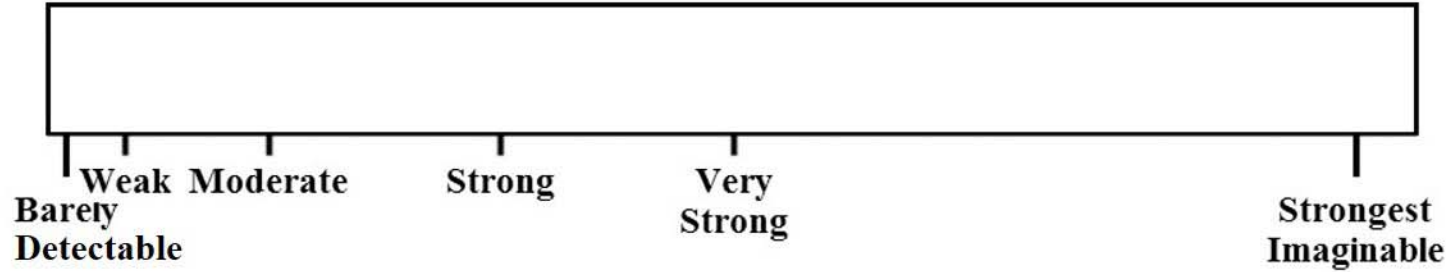

## PLEASANTNESS

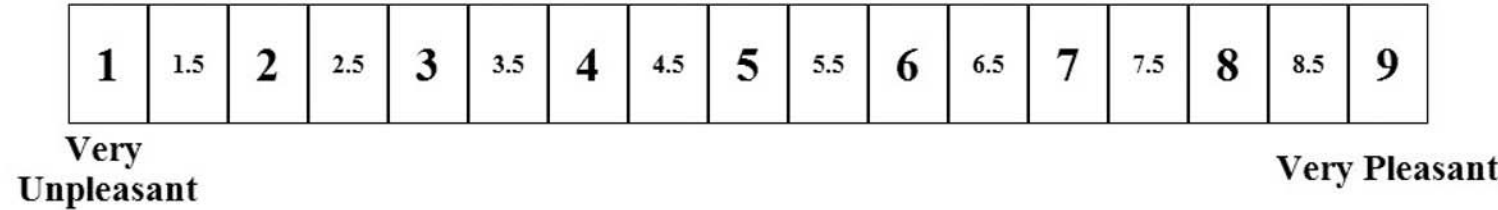

## REPRESENTATIVENESS

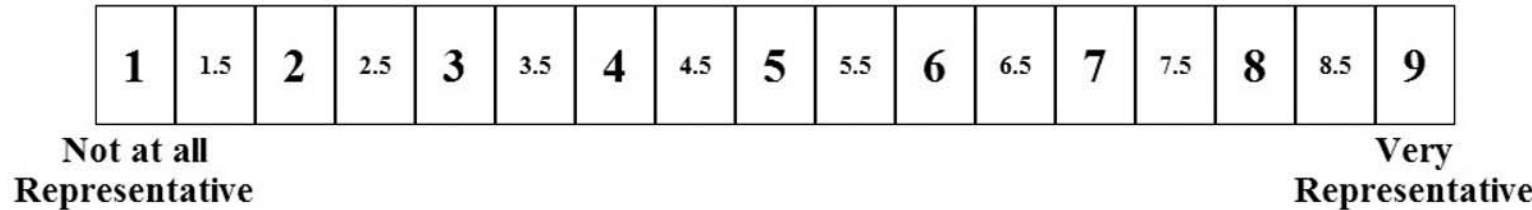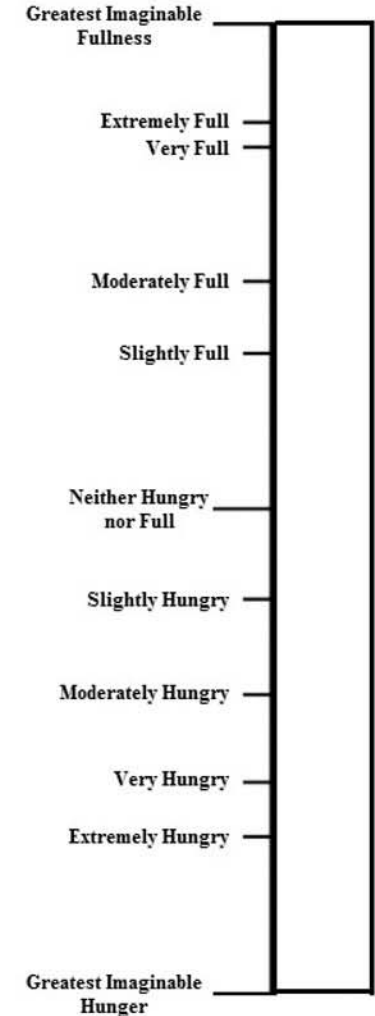

**Figure S2.** *Odor Intensity* was measured on a horizontally oriented 100mm labeled magnitude scale anchored by “Barely Detectable” and “Strongest Imaginable”. *Odor Pleasantness* was measured on a Likert-like scale in half increments from 1 – 9 anchored at “Very Unpleasant” and “Very Pleasant”. *Odor Representativeness* was measured on a Likert-like scale in half increments from 1 – 9 anchored at “Not at all Representative” and “Very Representative”. Hunger was measured on a vertically oriented 100mm labeled magnitude scale anchored by “Greatest Imaginable Hunger” and “Greatest Imaginable Fullness”. These scales shown are as viewed by the subject through the E-Prime presentation software.

## ALCOHOL SUBJECTIVE EFFECTS SCALES

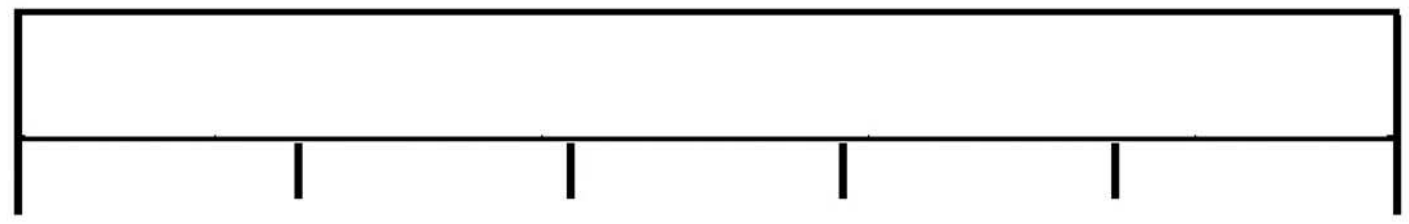

**Not At All**

**Most Ever**

## ALCOHOL DRINKS SCALES

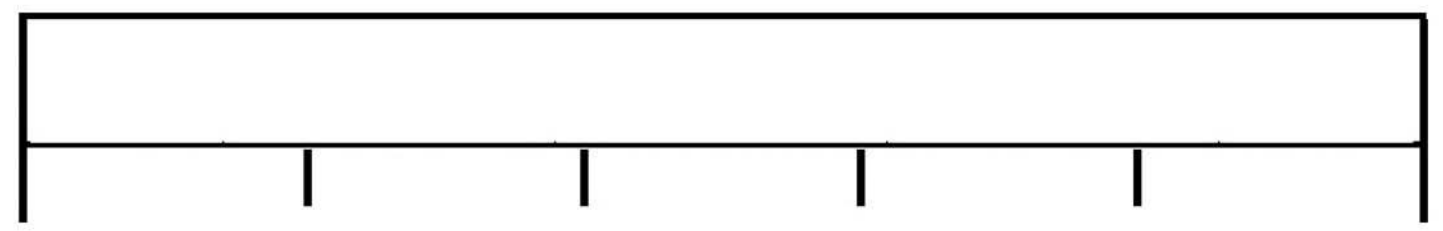

**0**

**1**

**2**

**3**

**4**

**5**

**Figure S3.** *Alcohol Subjective Effects* were measured on a horizontally oriented 100mm visual analog scales anchored by “Not At All” and “Most Ever” for perceived Anxiety, Intoxication, Numbness / Tingling, and Feeling High. *Number of Alcohol Drinks* were measured on a similar horizontally oriented 100mm visual analog scale which was anchored by “0” and “5”. These are the scales as viewed by the subjects as presented through E-Prime.

**Breakfast**

---

- Turkey Sausage
- French Toast
  - with Syrup
  - with Margarine
- Fruit Cup
- Customary Breakfast Beverage
  - Coffee
  - Tea
  - Soda (diet only)
  - Water

---

All subjects received a uniform breakfast that included all the items above with each item's portion adjusted such that the entire breakfast accounted for 20% of the subject's daily energy requirement for weight maintenance

Page 38 of 53  
**Table S2. BOLD Activation**

| Region                                               | Cluster Size ( <i>k</i> ) | Peak Voxel           |          |          | <i>Z</i>          | <i>p</i> <sub>uncorr</sub> |
|------------------------------------------------------|---------------------------|----------------------|----------|----------|-------------------|----------------------------|
|                                                      |                           | MNI Coordinates (mm) |          |          |                   |                            |
|                                                      |                           | <i>x</i>             | <i>y</i> | <i>z</i> |                   |                            |
| <b><i>Effect of Odorant Stimulation (n = 35)</i></b> |                           |                      |          |          |                   |                            |
| L Amygdala / Piriform Cortex                         | 21346                     | -25                  | 0        | -19      | Inf <sup>†</sup>  | <0.001                     |
| R Amygdala / Piriform Cortex                         |                           | 25                   | -1       | -18      | Inf <sup>†</sup>  | <0.001                     |
| L Hippocampus                                        |                           | -20                  | -7       | -13      | 7.34 <sup>†</sup> | <0.001                     |
| L Orbitofrontal Cortex                               | 45858                     | -28                  | 34       | -11      | 7.08 <sup>†</sup> | <0.001                     |
| Precuneus                                            | 6569                      | -3                   | -34      | 34       | 6.40 <sup>†</sup> | <0.001                     |
| Medial Prefrontal Cortex                             | 11361                     | -5                   | 58       | -2       | 6.06 <sup>†</sup> | <0.001                     |
| R Orbitofrontal Cortex                               | 1844                      | 24                   | 27       | -16      | 5.78 <sup>†</sup> | <0.001                     |
| <b><i>FO &gt; IEd (n = 35)</i></b>                   |                           |                      |          |          |                   |                            |
| R Orbitofrontal Cortex                               | 152                       | 41                   | 35       | -11      | 3.96              | <0.001                     |
| L Precuneus                                          | 570                       | -8                   | -44      | 36       | 3.83              | <0.001                     |
| R Ventral Striatum / Putamen                         | 164                       | 17                   | 6        | -10      | 3.82*             | <0.001                     |
| L Dorsolateral Cortex                                | 71                        | -42                  | 18       | 52       | 3.80              | <0.001                     |
| L Superior Frontal Cortex                            | 174                       | -19                  | 45       | 32       | 3.77              | <0.001                     |
| L Anterior Cingulate Cortex                          | 407                       | -4                   | 32       | -2       | 3.75*             | <0.001                     |
| L Ventromedial Prefrontal Cortex                     |                           | -7                   | 54       | 0        | 3.53*             | <0.001                     |
| L Amygdala / Piriform Cortex                         | 25                        | -21                  | -8       | -12      | 3.51*             | <0.001                     |
| L Insula                                             | 87                        | -36                  | 10       | -13      | 3.51              | <0.001                     |
| R Amygdala / Piriform Cortex                         | 50                        | 14                   | -9       | -19      | 3.47*             | <0.001                     |
| R Insula                                             | 9                         | 40                   | 13       | -12      | 3.29              | 0.001                      |
| L Nucleus Accumbens                                  | 7                         | -3                   | 2        | -5       | 3.27*             | 0.001                      |
| L Ventral Striatum / Putamen                         | 15                        | -17                  | 6        | -9       | 3.26*             | 0.001                      |
| R Hippocampus                                        | 17                        | 24                   | -8       | -16      | 3.26              | 0.001                      |

Height threshold,  $p \leq 0.001$ ,  $\dagger p_{FWE} \leq 0.05$ , corrected for whole brain volume; \* $p_{FWE} \leq 0.05$ , adjusted for a priori search regions;

Ref 26-28. MNI = Montreal Neurological Institute
